# Supplementary material for: Autologous HER2-specific CAR T-cells after lymphodepletion for advanced sarcoma
Source: Research Square preprint supplement (doi:10.21203/rs.3.rs-2409436/v1), 2023-01-06
Supplement: Supplementary file 1 [file 6fe21248b764b5d02fc30ede.docx]

**Supplementary Table 1: Adverse events within the first 6 weeks post HER2-CART infusion**

| **Adverse Event** | **Cohort A** (n=3) | | **Cohort B** (n=9) | | **Cohort C** (n=2) | |
| --- | --- | --- | --- | --- | --- | --- |
| **Grade 1-2** | **Grade 3-4** | **Grade 1-2** | **Grade 3-4** | **Grade 1-2** | **Grade 3-4** |
| **Hematological**  Anemia  Neutropenia  Lymphopenia  Thrombocytopenia  Leukopenia | 0* (0)**  1 (0)  0 (0)  1 (0)  2 (0) | 0 (0)  0 (0)  3 (0)  0 (0)  1 (0) | 5 (0)  0 (0)  0 (0)  4 (0)  0 (0) | 3 (0)  9 (0)  9 (0)  1 (0)  9 (0) | 0 (0)  0 (0)  0 (0)  1 (0)  0 (0) | 0 (0)  2 (0)  2 (0)  0 (0)  2 (0) |
| **Respiratory**  Cough  Dyspnea  Tachypnea  Hypoxia  Respiratory failure  Hypercapnia | 0 (0)  0 (0)  0 (0)  1 (1)  0 (0)  0 (0) | 0 (0)  0 (0)  0 (0)  0 (0)  0 (0)  0 (0) | 1 (1)  0 (0)  1 (1)  1 (1)  0 (0)  0 (0) | 0 (0)  1 (1)  0 (0)  0 (0)  0 (0)  0 (0) | 1 (1)  1 (1)  2 (2)  1 (1)  0 (0)  0 (0) | 0 (0)  1 (1)  0 (0)  1 (1)  1 (1)  1 (1) |
| **Cardiovascular**  Sinus Tachycardia  Hypertension  Hypotension | 1 (1)  0 (0)  0 (0) | 0 (0)  0 (0)  1 (1) | 1 (1)  1 (1)  2 (2) | 0 (0)  0 (0)  0 (0) | 1 (1)  0 (0)  0 (0) | 1 (1)  0 (0)  1 (1) |
| **General**  Chills  Fever  Fatigue  Malaise  Non-cardiac chest pain  Pain  Back pain  Myalgia  Anorexia  Generalized muscle weakness | 0 (0)  2 (2)  1 (1)  0 (0)  0 (0)  1 (1)  0 (0)  1(1)  0 (0)  0 (0) | 0 (0)  0 (0)  0 (0)  0 (0)  0 (0)  0 (0)  0 (0)  0 (0)  0 (0)  0 (0) | 1 (1)  7 (7)  3 (1)  0 (0)  2 (2)  0 (0)  0 (0)  0 (0)  2 (0)  0 (0) | 0 (0)  0 (0)  0 (0)  0 (0)  0 (0)  0 (0)  0 (0)  0 (0)  0 (0)  0 (0) | 2 (2)  1 (1)  2 (2)  0 (0)  0 (0)  0 (0)  1 (1)  0 (0)  0 (0)  1 (0) | 0 (0)  1 (1)  0 (0)  0 (0)  0 (0)  0 (0)  0 (0)  0 (0)  0 (0)  0 (0) |
| **Gastrointestinal**  Nausea  Vomiting  Mucositis, oral | 2 (0)  1 (0)  0 (0) | 0 (0)  0 (0)  0 (0) | 5 (1)  5 (0)  1 (0) | 0 (0)  0 (0)  0 (0) | 2 (1)  1 (0)  0 (0) | 0 (0)  0 (0)  0 (0) |
| **Neurological**  Headache  Dizziness  Tremor  Presyncope  Confusion | 0 (0)  0 (0)  0 (0)  0 (0)  0 (0) | 0 (0)  0 (0)  0 (0)  0 (0)  0 (0) | 1 (0)  2 (1)  1 (1)  0 (0)  0 (0) | 0 (0)  0 (0)  0 (0)  0 (0)  0 (0) | 0 (0)  0 (0)  0 (0)  1 (0)  1 (0) | 0 (0)  0 (0)  0 (0)  0 (0)  0 (0) |
| **Metabolic, Renal and Others**  Elevated creatinine  Electrolyte abnormalities  Hypermagnesemia  Hypomagnesemia  Hypocalcemia  Hypokalemia  Hyponatremia  Increased aspartate aminotransferase  Increased alanine aminotransferase | 0 (0)  0 (0)  0 (0)  0 (0)  0 (0)  0 (0)  0 (0)  1 (0) | 0 (0)  0 (0)  0 (0)  0 (0)  0 (0)  0 (0)  0 (0)  0 (0) | 1 (0)  1 (0)  1 (0)  1 (0)  3 (0)  4 (0)  4 (1)  1 (0) | 0 (0)  0 (0)  0 (0)  0 (0)  0 (0)  0 (0)  0 (0)  0 (0) | 0 (0)  1 (0)  1 (0)  2 (0)  1 (0)  1 (0)  2 (1)  0 (0) | 0 (0)  0 (0)  0 (0)  0 (0)  0 (0)  0 (0)  0 (0)  0 (0) |
| **Cytokine Release Syndrome (CRS)** | 2 (2) | 0 (0) | 7 (7) | 0 (0) | 0 (0) | 2 (2) |
| *Study related adverse events  ( )**Adverse events related to the investigational agent | | | | | | |
