# Supplementary material for: Autologous HER2-specific CAR T-cells after lymphodepletion for advanced sarcoma
Source: Research Square preprint supplement (doi:10.21203/rs.3.rs-2409436/v1), 2023-01-06
Supplement: Supplementary file 2 [file c2d490221c444fcca54f6ed4.docx]

**Statistical Analysis Plan**

1. **Introduction**
   1. Phase I open-label dose-escalation study of autologous HER2-specific CAR T cells for patients with advanced sarcoma (NCT00902044)
2. **Study Objectives**
   1. Primary Objective
      1. To determine the safety of one intravenous injection of autologous T cells expressing HER2-specific CAR in patients with advanced HER2-positive sarcoma.
      2. To determine the safety of one intravenous injection of 1x108/m2 autologous T cells expressing HER2-specific CAR in patients with advanced HER2-positive sarcoma after lymphodepleting chemotherapy.
   2. Secondary Objective
      1. To assess the *in vivo* expansion and persistence of infused T cells using immunoassays and transgene detection
      2. To assess the anti-tumor effects of the infused HER2-specific T cells
   3. Exploratory Objective
      1. To evaluate the endogenous immune responses following lymphodepletion and CAR T-cell infusion
      2. To evaluate the CAR T-cell availability and antigen expression in post-infusion tumor tissue in patients undergoing tumor excision/biopsy
3. **Inclusion and Exclusion Criteria for Study Treatment**
   1. Inclusions Criteria
      1. Diagnosis of refractory HER2-positive sarcoma or metastatic HER2-positive sarcoma with disease progression after receiving at least one prior systemic therapy. Patients in whom tumor resection (gross total or subtotal) is clinically indicated are eligible to receive T-cell infusion after lymphodepleting chemotherapy at least 4 weeks prior to the planned surgery. Immunohistochemistry (IHC) or RT-PCR will be used to determine HER2 positivity. Results will be compared to standard controls. HER2 expression in tumors on IHC should be ≥ grade 1 and ≥1+ intensity score. Wherein grades are defined as: Grade 0: no staining; Grade 1: 1-25%; Grade 2: 26-50% and Grade 3: 51-100% of cell staining for HER2 and intensity scores are: negative; 1+; 2+ and 3+ using breast cancer standard arrays as a guide for intensity
      2. Recovered from the acute toxic effects of all prior cytotoxic chemotherapy at least 4 weeks before entering this study. PD1/PDL1 inhibitors will be allowed to continue during treatment if medically indicated.
      3. Normal ECHO (Left ventricular ejection fraction (LVEF) has to be with in normal, institutional limits)
      4. Life expectancy ≥ 6 weeks
      5. Karnofsky/Lansky score of ≥ 50
      6. Bilirubin <3x, AST/ALT <3x, Serum creatinine <2x upper limit of normal,
         Hgb ≥ 7.0 g/dl; WBC>2,000/μL, ANC>1,000/μL, platelets > 100,000/μL. Creatinine clearance is needed for patients with creatinine greater than 1.5 times upper limit of normal.
      7. Pulse oximetry of ≥ 90% on room air
      8. Baseline evaluation of the lungs with chest radiograph
      9. Sexually active patients must be willing to utilize one of the more effective birth control methods for 6 months after the T-cell infusion. Male partner should use a condom
      10. Available autologous transduced cytotoxic T lymphocytes with ≥15% expression of HER2 CAR and killing of HER2-positive targets ≥20% in cytotoxicity assay
      11. Informed consent explained to, understood by and signed by patient/guardian. Patient/guardian given copy of informed consent
   2. Exclusion Criteria
      1. Severe intercurrent infection
      2. Known HIV positivity
      3. Pregnant or lactating
      4. History of hypersensitivity reactions to murine protein-containing products
      5. Severe previous toxicity from cyclophosphamide or fludarabine
4. **Study Procedures** *(please refer to the attached study protocol for details)*
   1. **Dose-escalation Plan for lymphodepletion cohort** *(Dose Levels 9A, B, C)*

*Dose Levels:*

Dose Level A: fludarabine followed by 1x108 cells/m2

Dose Level B: fludarabine + cyclophosphamide followed by 1x108 cells/m2

Dose Level C: fludarabine + cyclophosphamide followed by 1x108 *CAR-positive* cells/m2

**For obese patients [body mass index (BMI) >95th percentile for patients <18 years of age or BMI ≥30 kg/m2 for those ≥18 years old], ideal body weight will be used to calculate body surface area for chemotherapy and cell dosing purposes.

*Dose levels A and B:* A modified continual reassessment method will be employed with cohorts of size 3 per dose level for patients who receive lymphodepleting chemotherapy prior to the infusion of one dose of HER2-specific T cells. There will be at least 3 weeks between any two enrolled patients on each dose level.

*Dose level C and the cohort expansion phase:* A cohort of 3 patients will be treated using T-cell dose specified at dose level C. If no dose limiting toxicity (DLT) occurs, the cohort will be expanded to treat six additional patients at the same dose level to further evaluate the safety and antitumor activity. If one DLT is observed in the first 3 patients treated, we will treat 3 additional patients to determine safety. If no further DLT is observed, then we will treat 3 additional patients at dose level C for a total of 9 patients. If 2 DLT are observed in the first 3 treated, we will expand the cohort at dose level B to obtain additional safety data.

**4.2 Lymphodepletion:**

Dose Level A:

| **Day** | **Agent** | **Dose/Administration** |
| --- | --- | --- |
| -5 | Fludarabine | >10 kg: 25 mg/m2/day; <10 kg: 1 mg/kg/day IV over 30 minutes |
| -4 | Fludarabine | >10 kg: 25 mg/m2/day; <10 kg: 1 mg/kg/day IV over 30 minutes |
| -3 | Fludarabine | >10 kg: 25 mg/m2/day; <10 kg: 1 mg/kg/day IV over 30 minutes |
| -2 | Fludarabine | >10 kg: 25 mg/m2/day; <10 kg: 1 mg/kg/day IV over 30 minutes |
| -1 | Fludarabine | >10 kg: 25 mg/m2/day; <10 kg: 1 mg/kg/day IV over 30 minutes |
| 0 | HER2-specific T cells | 1x108 cells/m2 |

Dose Level B and C:

| **Day** | **Agent** | **Dose/Administration** |
| --- | --- | --- |
| -7 | Cyclophosphamide | 30 mg/kg/day IV over 1 hour (with Mesna and IV hydration) |
| Fludarabine | >10 kg: 25 mg/m2/day; <10 kg: 1 mg/kg/day IV over 30 minutes |
| -6 | Cyclophosphamide | 30 mg/kg/day IV over 1 hour (with Mesna and IV hydration) |
| Fludarabine | >10 kg: 25 mg/m2/day; <10 kg: 1 mg/kg/day IV over 30 minutes |
| -5 | Fludarabine | >10 kg: 25 mg/m2/day; <10 kg: 1 mg/kg/day IV over 30 minutes |
| -4 | Fludarabine | >10 kg: 25 mg/m2/day; <10 kg: 1 mg/kg/day IV over 30 minutes |
| -3 | Fludarabine | >10 kg: 25 mg/m2/day; <10 kg: 1 mg/kg/day IV over 30 minutes |
| -2 | Rest |  |
| -1 | Rest |  |
| 0 | HER2-specific T cells | 1x108 cells/m2 (Dose level B)  OR  1x108 CAR-positive cells/m2 (Dose level C) |

**4.3 Additional Doses of HER2-specific T cells**

Patients who tolerate the initial infusion well and have no significant clinical decline are eligible to receive additional doses of HER2-specific T cells at 6 to 12 weeks intervals-each of which will consist of the same cell number as their first HER2-specific T-cell injection. Patients will not be able to receive additional doses until the initial safety profile is completed 6 weeks following the first HER2-specific T-cell infusion. For the first two subsequent HER2-specific T-cell infusions, patients will be able to receive additional lymphodepleting chemotherapy according to their dose levels. Patients will be monitored after each HER2-specific T-cell infusion using the study calendar outlined in the protocol, except for patients who achieve a complete response (CR) post infusion. Patients achieving a complete response who receive additional doses of CAR T-cells without lymphodepletion may have disease evaluation performed per standard of care in lieu of the study calendar schedule.

1. **Study Design and Statistical Considerations**

Each patient will be followed for 6 weeks after the T-cell infusion for evaluation of dose limiting toxicity. For this trial,the maximum tolerated dose (MTD) is defined to be the dose which causes dose limiting toxicity (DLT) in any patient. The toxicity will be evaluated by the NCI Common Terminology Criteria for Adverse Events (CTCAE) version 4.X, with the exception of CRS and neurological toxicities that are related to T-cell infusions. CRS and neurological toxicities will be graded according to Appendix III.

Except as noted below, any Grade 3, 4, or 5 toxicities primarily related to the CTL infusion will be defined as a DLT. Any such toxicities where there is a question of causality will be discussed with the FDA. Grade 3 and 4 expected reactions seen with the use of CAR-based immunotherapy such as (but not limited to) fever and hypotension requiring pressor support will not be considered DLTs. Grade 3 and 4 cytokine release syndrome (CRS) infusion reactions (including CRS) or neurological toxicities that are persistent beyond 72 hours will be reported to the FDA in an expedited fashion and will be considered a treatment limiting toxicity. Patients who experience prolongation of hospitalization beyond 5 days after T-cell infusion will be reported to the FDA in an expedited fashion.

All patients within a dose cohort should have completed the 6-week window after the T-cell infusion for assessment of dose limiting toxicity as defined below prior to enrollment of patients into the next recommended dose level.

**5.1 Dose Levels 9A, B, C: T-cell infusion with lymphodepleting chemotherapy**

If the dose level 9 of 1x108 cells/m2 (tested using mCRM dose-escalation design without lymphodepletion) is well tolerated with no DLT, we will recruit additional patients to determine the safety of one intravenous injection of MTD level of autologous T cells expressing HER2-specific CAR in patients with advanced HER2-positive sarcoma after lymphodepleting chemotherapy. The following three treatment regimens with increasing likelihood of toxicity will be studied:

1. fludarabine plus T cells at Dose level A (1x108/m2 total cells)
2. fludarabine plus cyclophosphamide plus T cells at Dose level B (1x108/m2 total cells)
3. fludarabine plus cyclophosphamide plus T cells at Dose level C (1x108/m2 CAR-positive cells)

Since the likelihood of serious adverse events for the combination of fludarabine and/or cyclophosphamide with T cells is not known, we implement a 3+3 type of escalation procedure to move from regimen (i) to regimen (ii). The first three patients will receive one injection of HER2-specific T cells after lymphodepletion with fludarabine only. If there is no DLT, then the trial moves on to regimen (ii). If there is one DLT, then 3 more patients will be studied at regimen (i). If 2/6 patients have DLT, then the trial will be halted due to excessive toxicity. If only 1/6 patients had DLT, then the trial will move on to regimen (ii). Similar procedure is repeated for regimen (ii). If less than 2/6 have DLTs, then the trial, the regimen (ii) is considered safe. By this procedure, a maximum of 12 patients will be used at Dose Level A and B.

Subsequently, once regimen (ii) has been considered safe, we will again implement a 3+3 type of escalation procedure to move from regimen (ii) to regimen (iii). The first three patients will receive one injection of 1x108 CAR-positive cells/m2 (Dose Level C). If there is no DLT, then an additional 6 patients will be enrolled in a cohort expansion phase to further evaluate the safety profile and define the recommended phase 2 dose (RP2D). If one DLT is observed in the first 3 patients treated, we will treat 3 additional patients to determine safety. If no further DLT is observed, then we will treat 3 additional patients at dose level C for a total of 9 patients. If 2 DLT are observed in the first 3 treated, we will expand the cohort at dose level B to obtain additional safety data. By this procedure, a maximum of 9 additional patients will be treated at Dose level C.

A separate criterion for halting the trial will be employed based on incidence of lymphoproliferation. Specifically, accrual will be stopped if one patient experiences lymphoproliferation at any time point during the study.

**5.1.1 Dose Levels A and B: T-cell infusion with lymphodepleting chemotherapy**

We will implement a stepwise approach to determine the safety of one intravenous injection of 1x108/m2 autologous HER2-specific T cells in patients with advanced HER2-positive sarcoma after lymphodepleting chemotherapy. The first three patients (Dose level A) will receive one injection of HER2-specific T cells after lymphodepletion with fludarabine and the subsequently enrolled nine patients (Dose level B) will receive cyclophosphamide and fludarabine.

**5.1.2 Dose Level C: T-cell infusion with lymphodepleting chemotherapy**

If dose levels A and B are well tolerated with no DLT, we will escalate to dose level C, which will consist of one intravenous injection of 1x108/m2 CAR-positive autologous HER2-specific T cells in patients with advanced sarcoma after lymphodepleting chemotherapy. A total of 9 patients will receive CAR T cells at Dose level C.

**5.2 Data Analysis**

Safety and toxicity outcomes will be summarized by dose groups.

The frequency of HER2-specific T cells will be measured in all patients and summarized at pre- and post- infusion time points using mean ± SD, medians and ranges to evaluate their expansion and persistence, and then will be compared with use of paired t-tests or, when appropriate, the Wilcoxon signed-rank test.

Plots of growth curves will be generated to illustrate patterns of HER2-specific T-cell expansion. Several plots will be generated to depict patterns of proliferation of adoptively transferred T cells. We have employed longitudinal modeling techniques such as the random coefficient mixed model to evaluate repeatedly measured CAR T-cell levels. These models account for variation in individual-level intercepts and slopes over the follow-up time. Thus, we will be able to model for proliferation of HER2-specific T cells over time and estimate the magnitude of expansion or decline of T cells. We will include dose level as an independent variable in the model to account for the different doses received by patients. Although repeated observations within the same patient are amenable to these types of modeling strategies, they will be considered exploratory and interpreted with caution due to the small numbers of patients in this trial.

Comparison of diagnostic imaging studies from pre-infusion to 6 weeks following the second infusion will be summarized. Frequencies and proportions of responders will be summarized overall and by dose groups if there are enough patients per dose group.

Data of immune response and HER2 antigen expression will be summarized descriptively using mean ± SD, medians and ranges and compared with t-test or Wilcoxon test whichever is appropriate.

The results of this study will not be definitive but only suggestive. A Phase II trial will be undertaken to study the efficacy of the treatment after determining the safe dose group

**5.3 Stopping Rules**

Enrollment to the study will be held if one patient develops dose-limiting toxicities. This enrollment hold rule does not mandate automatic closure of the study. It serves as a rule to trigger oversight by FDA. The FDA will review all available data on any SAE where the relationship to T-cell is suspected. Based on the evaluations, the FDA may recommend modifications to the study in order to ensure subject safety or recommend stopping the trial.

**5.4 Modified Follow-Up and Off Study Criteria**

The following criteria will result in the patient being ineligible for further treatment on the protocol although response data will continue to be collected as applicable:

**Modified Follow-Up Criteria:**

- Any patient who develops irreversible, life threatening or Grade 3 to 5 toxicity consideredto be primarily related to CTL injection will be taken off treatment. In such patients the toxicities will be followed until resolution or until their off-study date.
- Any patient who receives any other hemopoietic cell product will be taken off treatment and adverse event data collection will cease.
- Any patient who receives therapy for relapse of their primary malignancy (except PD1/PDL1 inhibitors) will be taken off treatment and adverse event data collection will cease. Any patient who experiences grade 3 or 4 cytokine release syndrome or neurological toxicity that persists beyond 72 hours will be taken off treatment. In such patients the toxicity will be followed until resolution or until their off-study date. In addition, this event will be reported to the FDA in an expedited fashion.
- Patients who meet ‘Modified Follow-Up’ criteria will remain in long term follow-up as per the study calendar.

**Off Study Criteria**

Patients will be off study if:

- They complete all study specified procedures
- Refusal of further study follow up by patient or legal guardian
- The patient becomes lost to follow-up
- The patient dies

1. **Appendix**

Study Calendar for Dose Level 9A, B, C

| **Study** | **Treatment** | | | | | | **Follow-up** | | | | | |
| --- | --- | --- | --- | --- | --- | --- | --- | --- | --- | --- | --- | --- |
| **Chemo- therapy** | **T-cell Therapy** | | | | |
| Wk  -1$ | Wk  0 | Wk 1 | Wk 2 | Wk 4 | Wk 6 | Mth  3 | Mth  6 | Mth  9 | Mth 12 | Every 6 mths x 4 years | Annually  x 15 years (total) |
| Flu# or  Ctx## + Flu | **X** |  |  |  |  |  |  |  |  |  |  |  |
| T-cell Infusion |  | **X** |  |  |  |  |  |  |  |  |  |  |
| Hx | **X** | **X** |  | **X** | **X** | **X** | **X** | **X** | **X** | **X** | **X** | **X** |
| PE | **X** | **X** |  | **X** | **X** | **X** |  |  |  |  |  |  |
| Performance Status | **X** | **X** |  | **X** | **X** | **X** |  |  |  |  |  |  |
| CBC d/p | **X** | **X** | **X** | **X** | **X** | **X** | **X** | **X** | **X** | **X** |  |  |
| Lytes,  BUN, Cr | **X** | **X** | **X** | **X** | **X** | **X** |  |  |  |  |  |  |
| AST, Bili, Alb | **X** | **X** | **X** | **X** | **X** | **X** |  |  |  |  |  |  |
| CRP | **X** | **X‡** |  |  |  |  |  |  |  |  |  |  |
| Pregnancy Test (Child Bearing Potential) ### | **X** |  |  |  |  |  |  |  |  |  |  |  |
| Function and Persistence Studies### | **X** | **X*** | **X**** | **X** | **X** | **X** | **X** | **X** | **X** | **X** | **X** | **X** |
| RCR Testing/  Archiving#### |  | **X** |  |  |  |  |  |  |  |  |  |  |
| Cytokines/ Chemokine### | **X†** | **X‡** | **X**** | **X** | **X** | **X** | **X** |  |  |  |  |  |
| Serum for storage for HAMA### |  | **X** |  |  |  | **X** |  |  |  |  |  |  |
| ECHO### | **X** |  |  |  |  | **X** |  |  |  |  |  |  |
| CT/MRI/PET | **X** |  |  |  |  | **X•** |  |  |  |  |  |  |
| Chest X-ray | **X** |  |  |  |  |  |  |  |  |  |  |  |
| Tumor tissue $$ |  |  |  |  |  |  |  |  |  |  |  |  |

$Flu starts day -5 and Ctx + Flu starts day -7

#Flu: fludarabine

##Ctx: cyclophosphamide

*pre-infusion and 1 to 4 hours post infusion

**one sample will be drawn 1 week post infusion, and 2nd and 3rd samples 2 days and 3-5 days post infusion, respectively, is optional

###study specific tests

#### Samples for RCR will be collected at baseline and if the patient develops a new malignancy

†one sample will be drawn pre-chemotherapy; a 2nd sample will be drawn 3-5 days after starting chemotherapy

‡one sample will be drawn pre-infusion. Additional samples will be collected at the onset of any CRS symptoms and daily thereafter until CRS resolves

•If tumor resection is performed before end of 6-week evaluation period, imaging studies will be obtained prior to surgery

$$will be collected when available for patients who undergo medically indicated surgical biopsy or resection

Pregnancy testing is only required in female patients of childbearing potential

Post infusion imaging (CT/MRI/PET) may be performed from 6-8 weeks post infusion with choice of tests dependent on the previous tests that have best estimated the amount of disease

Long term follow up will be per SOP for follow up of gene transfer patients. At time points of 3 months and beyond contact may be by telephone call from PI or research nurse/research coordinator
